# Supplementary material
Source: ML conference proceedings conference paper supplement (https://openreview.net/forum?id=chwxOOwzFR)
Supplement: supplementary_material [file attachment]

https://www.loom.com/share/00d4bef81c64459d90512b4dc76748bd?sid=d3e4f354-d8d9-45d7-99ab-4b677d4900ec
